# Supplementary material for: Association of Combined Patterns of Tobacco and Cannabis Use in Adolescence With Psychotic Experiences
Source: PubMed Central journal article supplement (PMC5885944; doi:10.1001/jamapsychiatry.2017.4271), 2018-01-17
Supplement: jamapsychiatry-75-240-s001.pdf [file jamapsychiatry-75-240-s001.pdf]

## Supplementary Online Content

Jones HJ, Gage SH, Heron J, et al. Association of combined patterns of tobacco and cannabis use in adolescence with psychotic experiences. *JAMA Psychol*. Published online January 17, 2018. doi:10.1001/jamapsychiatry.2017.4271

### eAppendix.

**eTable 1.** Proportion of Individuals Who Class Themselves as Cannabis Users, But Not Cigarette Users, That Smoke Cannabis With Tobacco

**eTable 2.** Comparison of Class Proportions Between Six and Four Time Point Models

**eTable 3.** Unadjusted and Adjusted Associations Between Cigarette and/or Cannabis Use and Psychotic Experiences at Age 18 Years, Individually Adjusting for Each Potential Confounder and Adjusting for All Confounders

**eTable 4.** Category and Missingness Frequencies and Percentages Across Data Collection Time Points

**eTable 5.** Sociodemographic Differences Between Individuals Who Were Included in the Derivation of Cannabis/Cigarette Use Latent Classes and Those Who Were Missing From the Analysis

**eTable 6.** Longitudinal Latent Class Model Fit Statistics Based on 6 Repeated Measures

**eTable 7.** Unadjusted and Adjusted Associations Between Cigarette and/or Cannabis Use and Psychotic Experiences at Age 18 Years

**eTable 8.** Associations Between Cigarette and/or Cannabis Use and Psychotic Experiences Not Experienced Within 2 Hours of Drug or Alcohol Use at Age 18 Years

**eTable 9.** Associations Between Cigarette/Cannabis Use and Psychotic Experiences vs Remainder and Psychotic Disorder vs Remainder at Age 18 Years

**eTable 10.** Unadjusted and Adjusted Associations Between Psychotic Experiences at Age 12 Years and Subsequent Cigarette and/or Cannabis Use

**eTable 11.** Associations Between Psychotic Experiences at Age 12 Years and Subsequent Cigarette and/or Cannabis Use, Limiting to Non-Users at Age 12 Years

**eFigure.** Comparisons Between 5-Class Models of Cigarette/Cannabis Use Patterns Created Using Six and Four Time Points

### eReferences

This supplementary material has been provided by the authors to give readers additional information about their work.

## eAppendix

### Repeated measures of cigarette and/or cannabis use

Measures taken at approximate age 14 years, 16 years and 18 years were collected as part of ALSPAC assessment clinics using a computerised interview. Measures taken at approximate age 15 years, 17 years and 19 years were collected via ALSPAC postal questionnaires. For each time point, individuals were deemed as cigarette users if they were current smokers who smoked at least 1-3 in the previous 6 months (age 14 years), who smoked less than once a week, weekly or daily (age 15 and 16 years), had smoked less than once a week, weekly or daily in the last 30 days (age 16, 18 and 19 years). Individuals were deemed as non-cigarette users if they had never smoked a cigarette, if they had only tried cigarettes once or twice (age 15 and 17 years) or if they had not smoked in the last 6 months (age 14 years) or last 30 days (age 16, 18 and 19 years). For each time point, individuals were deemed as cannabis users if they had used or taken cannabis at least 1-3 times in the past 6 months (age 14 years), currently take cannabis less than weekly, weekly or daily (age 15, 16 and 17 years) or at least monthly or less in the last 12 months (age 18 and 19 years). Individuals were deemed as non-cannabis users if they had never tried cannabis, if they had only ever tried cannabis once or twice or if they used to sometimes use or take cannabis but had since stopped.

### Psychotic experiences

The semi-structured Psychosis-Like Symptom Interview (PLIKSi)<sup>1,2</sup> was used as part of ALSPAC assessment clinics to assess psychotic experiences. The interviewers were psychology graduates trained in assessment using the SCAN psychosis section and using the PLIKSi. Psychotic experiences were rated as not present, suspected, or definitely psychotic. Unclear responses were always 'rated down' and symptoms were rated as definite only when a clear example was provided. At regular intervals, samples of recorded interviews were also rated by a psychiatrist to ensure that interviewers were rating experiences correctly. The PLIKSi shows very good inter-rater and test-retest reliability.<sup>3</sup>

The primary psychotic experience measures at ages 12 and 18 years were binary variables relating to whether an individual had at least one definite psychotic experience compared to suspected or no psychotic experiences.

Secondary outcome measures at ages 12 and 18 years were binary variables relating to whether an individual had at least one definite psychotic experience compared to no psychotic experiences. At age 18 years, an additional variable was created and tested relating to whether or not an individual had a psychotic disorder. Cases of psychotic disorder were defined as individuals with definite psychotic experiences that were not attributable to the effects of sleep or fever and when the psychotic experiences: i) occurred at least once per month over the past 6 months, and ii) caused severe distress, had a very negative effect on social/occupational function, or led to help seeking from a professional source.<sup>2</sup>

## Potential confounders

A number of potential confounders were examined: sex (binary measure), family history of schizophrenia or depression (binary measure assessed via maternal and paternal questionnaire), family history of drug use (binary measure assessed via maternal and paternal questionnaire), maternal smoking during pregnancy (binary measure assessed via maternal questionnaire), paternal smoking during pregnancy (binary measure assessed via maternal and paternal questionnaire), maternal education (5-level categorical measure assessed via maternal questionnaire), maternal/paternal social class (4-level categorical measure assessed via maternal questionnaire), IQ at age 8 years (assessed via the Wechsler Intelligence Scale for Children<sup>4</sup>), bullying at age 8 years (a binary measure relating to whether individual experienced relational or overt bullying, assessed via interview at age 8 years), Strengths and Difficulties Questionnaire (SDQ)<sup>5</sup> score at age 9 years relating to conduct problems, hyperactivity, emotional symptoms, peer problems and prosocial behaviour (total score assessed via parental-completed questionnaire when child was age 9 years), alcohol use at age 12 years (ordinal measure: none/less than weekly/weekly consumption of at least one whole drink assessed via child-completed interview), exposure to traumatic events (ordinal measure: none/moderate/severe) in mid-childhood (81 and 103 months) (assessed via a parental-completed questionnaire; see Crane et al. 2014<sup>6</sup> for more detail). Association analyses

Multinomial regression was used to assess whether psychotic experiences at age 12 years were associated with subsequent latent class membership. Associations were assessed using a manual implementation of the bias-adjusted three-step method (see Heron et al. 2015<sup>7</sup> for more detail and example of code). The latent classes were first derived without the presence of psychotic experiences. The resulting logit parameters defining the relationship between modal and latent classes were used as constraints allowing odds ratios and confidence intervals for the associations to be calculated without influencing latent class membership.

**eTable 1.** Proportion of individuals who class themselves as cannabis users, but not cigarette users, that smoke cannabis with tobacco

| <b>Age (years)</b> | <b>No. cannabis users but not cigarette users</b> | <b>No. (%) use cannabis with tobacco</b> |
|--------------------|---------------------------------------------------|------------------------------------------|
| <b>16</b>          | 110                                               | 90 (82)                                  |
| <b>17</b>          | 100                                               | 90 (90)                                  |
| <b>18</b>          | 197                                               | 164 (83)                                 |

**Note:** Data on methods of cannabis use are not available at the other ages used within the current study.

**eTable 2.** Comparison of class proportions between six and four time point models

|       |                                                 | Number of time points in model |      |
|-------|-------------------------------------------------|--------------------------------|------|
|       |                                                 | 6                              | 4    |
| Class | Early-onset cannabis with/without cigarette use | 0.03                           | 0.03 |
|       | Late-onset cannabis with/without cigarette use  | 0.12                           | 0.08 |
|       | Early-onset cigarette-only use                  | 0.04                           | 0.03 |
|       | Late-onset cigarette-only use                   | 0.15                           | 0.15 |
|       | Non-use                                         | 0.66                           | 0.71 |

**eTable 3.** Unadjusted and adjusted associations between cigarette and/or cannabis use and psychotic experiences at age 18 years, individually adjusting for each potential confounder and adjusting for all confounders

|                                                      |          | <b>Definite PE</b>             |                |                                |                |
|------------------------------------------------------|----------|--------------------------------|----------------|--------------------------------|----------------|
|                                                      |          | <b>Unadjusted</b>              |                | <b>Adjusted</b>                |                |
|                                                      | <b>N</b> | <b>OR (95% CI)<sup>a</sup></b> | <b>P value</b> | <b>OR (95% CI)<sup>a</sup></b> | <b>P value</b> |
| <b>Sex</b>                                           |          |                                |                |                                |                |
| Early-onset cigarette-only                           | 3854     | 2.58 (1.02, 6.51)              | <0.001         | 2.05 (0.79, 5.35)              | <0.001         |
| Early-onset cannabis                                 |          | 3.28 (1.48, 7.26)              |                | 3.40 (1.56, 7.44)              |                |
| Late-onset cigarette-only                            |          | 0.90 (0.36, 2.24)              |                | 0.75 (0.29, 1.95)              |                |
| Late-onset cannabis                                  |          | 3.47 (2.09, 5.76)              |                | 3.42 (2.06, 5.69)              |                |
| <b>Family history of schizophrenia or depression</b> |          |                                |                |                                |                |
| Early-onset cigarette-only                           | 2950     | 2.80 (0.92, 8.54)              | <0.001         | 2.73 (0.90, 8.33)              | <0.001         |
| Early-onset cannabis                                 |          | 4.82 (2.16, 10.72)             |                | 4.78 (2.14, 10.68)             |                |
| Late-onset cigarette-only                            |          | 0.93 (0.33, 2.68)              |                | 0.96 (0.34, 2.70)              |                |
| Late-onset cannabis                                  |          | 3.53 (2.00, 6.21)              |                | 3.46 (1.97, 6.10)              |                |
| <b>Family history of drug use</b>                    |          |                                |                |                                |                |
| Early-onset cigarette-only                           | 2950     | 2.72 (0.86, 8.55)              | <0.001         | 2.72 (0.86, 8.55)              | <0.001         |
| Early-onset cannabis                                 |          | 4.80 (2.15, 10.70)             |                | 4.80 (2.15, 10.70)             |                |
| Late-onset cigarette-only                            |          | 0.93 (0.32, 2.68)              |                | 0.93 (0.32, 2.68)              |                |
| Late-onset cannabis                                  |          | 3.54 (2.01, 6.23)              |                | 3.54 (2.01, 6.23)              |                |
| <b>Maternal smoking during pregnancy</b>             |          |                                |                |                                |                |
| Early-onset cigarette-only                           | 3770     | 2.70 (1.07, 6.81)              | <0.001         | 2.16 (0.82, 5.70)              | <0.001         |
| Early-onset cannabis                                 |          | 3.38 (1.53, 7.48)              |                | 3.06 (1.38, 6.79)              |                |
| Late-onset cigarette-only                            |          | 0.86 (0.32, 2.27)              |                | 0.85 (0.33, 2.19)              |                |
| Late-onset cannabis                                  |          | 3.65 (2.19, 6.08)              |                | 3.41 (2.05, 5.68)              |                |

| <b>Paternal smoking during pregnancy<sup>†</sup></b> |      |                   |        |                   |        |
|------------------------------------------------------|------|-------------------|--------|-------------------|--------|
| Early-onset cigarette-only                           | 3030 | 1.79 (0.50, 6.48) | <0.001 | 1.47 (0.38, 5.7)  | <0.001 |
| Early-onset cannabis                                 |      | 4.09 (1.86, 8.97) |        | 3.68 (1.66, 8.13) |        |
| Late-onset cigarette-only                            |      | 0.95 (0.36, 2.54) |        | 0.94 (0.36, 2.43) |        |
| Late-onset cannabis                                  |      | 3.63 (2.09, 6.30) |        | 3.29 (1.85, 5.83) |        |
| <b>Maternal education</b>                            |      |                   |        |                   |        |
| Early-onset cigarette-only                           | 3767 | 2.31 (0.84, 6.33) | <0.001 | 1.94 (0.64, 5.90) | <0.001 |
| Early-onset cannabis                                 |      | 3.28 (1.50, 7.18) |        | 3.65 (1.67, 7.98) |        |
| Late-onset cigarette-only                            |      | 0.86 (0.34, 2.19) |        | 0.83 (0.33, 2.11) |        |
| Late-onset cannabis                                  |      | 3.36 (2.01, 5.61) |        | 3.43 (2.05, 5.76) |        |
| <b>Highest parental social class<sup>†</sup></b>     |      |                   |        |                   |        |
| Early-onset cigarette-only                           | 3635 | 2.44 (0.90, 6.58) | <0.001 | 2.12 (0.73, 6.18) | <0.001 |
| Early-onset cannabis                                 |      | 3.22 (1.40, 7.40) |        | 3.42 (1.49, 7.86) |        |
| Late-onset cigarette-only                            |      | 0.84 (0.31, 2.25) |        | 0.79 (0.29, 2.15) |        |
| Late-onset cannabis                                  |      | 3.51 (2.08, 5.92) |        | 3.57 (2.12, 6.03) |        |
| <b>IQ at age 8 years</b>                             |      |                   |        |                   |        |
| Early-onset cigarette-only                           | 3464 | 2.80 (1.04, 7.59) | <0.001 | 2.73 (1.00, 7.42) | <0.001 |
| Early-onset cannabis                                 |      | 3.80 (1.73, 8.36) |        | 3.90 (1.78, 8.56) |        |
| Late-onset cigarette-only                            |      | 0.87 (0.32, 2.32) |        | 0.86 (0.32, 2.30) |        |
| Late-onset cannabis                                  |      | 3.06 (1.75, 5.38) |        | 3.10 (1.77, 5.43) |        |
| <b>Experiencing bullying at age 8 years</b>          |      |                   |        |                   |        |
| Early-onset cigarette-only                           | 3373 | 2.86 (1.06, 7.71) | <0.001 | 2.79 (1.03, 7.55) | <0.001 |
| Early-onset cannabis                                 |      | 3.53 (1.53, 8.16) |        | 3.54 (1.52, 8.28) |        |
| Late-onset cigarette-only                            |      | 0.85 (0.31, 2.35) |        | 0.85 (0.31, 2.32) |        |
| Late-onset                                           |      | 3.40 (1.96, 5.83) |        | 3.40 (1.96, 5.83) |        |

|                                                               |      |                    |        |                    |        |
|---------------------------------------------------------------|------|--------------------|--------|--------------------|--------|
| cannabis                                                      |      | 5.88)              |        | 5.89)              |        |
| <b>Emotional/behavioural problems (SDQ score age 9 years)</b> |      |                    |        |                    |        |
| Early-onset cigarette-only                                    | 3424 | 2.75 (1.02, 7.36)  | <0.001 | 2.44 (0.86, 6.98)  | <0.001 |
| Early-onset cannabis                                          |      | 3.78 (1.72, 8.31)  |        | 3.67 (1.64, 8.17)  |        |
| Late-onset cigarette-only                                     |      | 0.91 (0.36, 2.34)  |        | 0.94 (0.37, 2.36)  |        |
| Late-onset cannabis                                           |      | 2.95 (1.63, 5.33)  |        | 2.95 (1.64, 5.32)  |        |
| <b>Alcohol use at age 12 years</b>                            |      |                    |        |                    |        |
| Early-onset cigarette-only                                    | 3377 | 2.49 (0.92, 6.71)  | <0.001 | 2.42 (0.88, 6.65)  | <0.001 |
| Early-onset cannabis                                          |      | 3.06 (1.34, 7.02)  |        | 2.87 (1.22, 6.74)  |        |
| Late-onset cigarette-only                                     |      | 0.85 (0.33, 2.23)  |        | 0.88 (0.35, 2.21)  |        |
| Late-onset cannabis                                           |      | 3.16 (1.86, 5.38)  |        | 3.06 (1.8, 5.19)   |        |
| <b>Trauma during mid childhood</b>                            |      |                    |        |                    |        |
| Early-onset cigarette-only                                    | 3592 | 2.63 (0.97, 7.13)  | <0.001 | 2.59 (0.95, 7.07)  | <0.001 |
| Early-onset cannabis                                          |      | 3.7 (1.68, 8.14)   |        | 3.63 (1.66, 7.97)  |        |
| Late-onset cigarette-only                                     |      | 0.8 (0.29, 2.18)   |        | 0.8 (0.29, 2.18)   |        |
| Late-onset cannabis                                           |      | 3.03 (1.76, 5.24)  |        | 3.06 (1.77, 5.28)  |        |
| <b>All potential confounders</b>                              |      |                    |        |                    |        |
| Early-onset cigarette-only                                    | 1854 | 1.81 (0.16, 20.83) | <0.001 | 0.78 (0.03, 19.92) | 0.01   |
| Early-onset cannabis                                          |      | 6.19 (2.42, 15.86) |        | 4.89 (1.77, 13.53) |        |
| Late-onset cigarette-only                                     |      | 1.35 (0.44, 4.09)  |        | 1.12 (0.36, 3.48)  |        |
| Late-onset cannabis                                           |      | 2.97 (1.31, 6.77)  |        | 2.77 (1.16, 6.64)  |        |

**Note:** PE, psychotic experiences; OR, odds ratio; 95% CI, 95% confidence interval; *P* value, omnibus *P* value for association between cigarette/cannabis use classes and psychotic experiences at age 18 years; SDQ, Strengths and Difficulties Questionnaire.

<sup>a</sup> Compared to non-use class.

<sup>†</sup> Adjusting for paternal smoking during pregnancy and parental social class made little difference when already accounting for maternal education and maternal smoking during pregnancy, therefore these variables were omitted from the analysis in the main paper



**eTable 4.** Category and missingness frequencies and percentages across data collection time points

| Age (years) | Category                              | Frequency | Percentage | Percentage among responders |
|-------------|---------------------------------------|-----------|------------|-----------------------------|
| 14          | Non-users                             | 4,449     | 83.94      | 95.60                       |
|             | Cigarette-only users                  | 68        | 1.28       | 1.46                        |
|             | Cannabis with/without cigarette users | 137       | 2.58       | 2.94                        |
|             | Missing                               | 646       | 12.19      | -                           |
| 15          | Non-users                             | 4,273     | 80.62      | 94.18                       |
|             | Cigarette-only users                  | 164       | 3.09       | 3.61                        |
|             | Cannabis with/without cigarette users | 100       | 1.89       | 2.20                        |
|             | Missing                               | 763       | 14.40      | -                           |
| 16          | Non-users                             | 3,614     | 68.19      | 81.75                       |
|             | Cigarette-only users                  | 412       | 7.77       | 9.32                        |
|             | Cannabis with/without cigarette users | 395       | 7.45       | 8.93                        |
|             | Missing                               | 879       | 16.58      | -                           |
| 17          | Non-users                             | 3,273     | 61.75      | 78.51                       |
|             | Cigarette-only users                  | 487       | 9.19       | 11.68                       |
|             | Cannabis with/without cigarette users | 409       | 7.72       | 9.81                        |
|             | Missing                               | 1,131     | 21.34      | -                           |
| 18          | Non-users                             | 2,385     | 45.00      | 67.35                       |
|             | Cigarette-only users                  | 477       | 9.00       | 13.47                       |
|             | Cannabis with/without cigarette users | 679       | 12.81      | 19.18                       |
|             | Missing                               | 1,759     | 33.19      | -                           |
| 19          | Non-users                             | 1,998     | 37.70      | 68.26                       |
|             | Cigarette-only users                  | 452       | 8.53       | 15.44                       |
|             | Cannabis with/without cigarette users | 477       | 9.00       | 16.30                       |
|             | Missing                               | 2,373     | 44.77      | -                           |

**eTable 5.** Sociodemographic differences between individuals who were included in the derivation of cannabis/cigarette use latent classes and those who were missing from the analysis

| Measure                                                             |                             |       | Included in the derivation of cannabis/cigarette use latent classes? |               | P      |
|---------------------------------------------------------------------|-----------------------------|-------|----------------------------------------------------------------------|---------------|--------|
|                                                                     |                             |       | No                                                                   | Yes           |        |
| Sex                                                                 | male                        | N (%) | 5,309 (55.55)                                                        | 2,326 (43.92) | <0.001 |
|                                                                     | female                      | N (%) | 4,249 (44.45)                                                        | 2,970 (56.08) |        |
| Highest parental social class                                       | professional/managerial     | N (%) | 3,122 (47.98)                                                        | 3,206 (64.39) | <0.001 |
|                                                                     | non-professional/managerial | N (%) | 3,385 (52.02)                                                        | 1,773 (35.61) |        |
| Household income (quintiles; lowest income = 1, highest income = 5) | 1                           | N (%) | 1,338 (26.12)                                                        | 651 (13.55)   | <0.001 |
|                                                                     | 2                           | N (%) | 1,102 (21.51)                                                        | 866 (18.02)   |        |
|                                                                     | 3                           | N (%) | 1,002 (19.56)                                                        | 974 (20.27)   |        |
|                                                                     | 4                           | N (%) | 886 (17.29)                                                          | 1,100 (22.89) |        |
|                                                                     | 5                           | N (%) | 795 (15.52)                                                          | 1,214 (25.27) |        |
| Crowding index                                                      | ≤ 1 individual per room     | N (%) | 7,391 (90.62)                                                        | 4,948 (96.92) | <0.001 |
|                                                                     | > 1 individual per room     | N (%) | 765 (9.38)                                                           | 157 (3.08)    |        |
| Parity                                                              | 0                           | N (%) | 3,342 (41.91)                                                        | 2,531 (49.15) | <0.001 |
|                                                                     | 1                           | N (%) | 2,788 (34.96)                                                        | 1,800 (34.95) |        |
|                                                                     | 2                           | N (%) | 1,262 (15.83)                                                        | 619 (12.02)   |        |
|                                                                     | 3+                          | N (%) | 582 (7.30)                                                           | 200 (3.88)    |        |
| Highest maternal education qualification                            | CSE                         | N (%) | 1,953 (26.65)                                                        | 574 (11.11)   | <0.001 |
|                                                                     | Vocational                  | N (%) | 847 (11.56)                                                          | 382 (7.40)    |        |
|                                                                     | O level                     | N (%) | 2,566 (35.02)                                                        | 1,761 (34.09) |        |

|                        |                  |              |               |               |        |
|------------------------|------------------|--------------|---------------|---------------|--------|
|                        | <b>A level</b>   | <b>N (%)</b> | 1,356 (18.50) | 1,445 (27.98) |        |
|                        | <b>Degree</b>    | <b>N (%)</b> | 606 (8.27)    | 1,003 (19.42) |        |
| <b>Ethnicity</b>       | <b>non-white</b> | <b>N (%)</b> | 232 (3.20)    | 94 (1.82)     | <0.001 |
|                        | <b>white</b>     | <b>N (%)</b> | 7,018 (96.80) | 5,057 (98.18) |        |
| <b>Birthweight (g)</b> |                  | <b>N</b>     | 8,664         | 5,231         | <0.001 |
|                        |                  | <b>Mean</b>  | 3361.08       | 3414.93       |        |
|                        |                  | <b>SD</b>    | 604.51        | 537.82        |        |

**Note:** CSE, Certificate of Secondary Education; SD, standard deviation; *P*, *P* value for chi-squared test (categorical measures) or t-test (birthweight) of differences between individuals used to derive cannabis/cigarette use latent classes and those who were missing from the analysis.

**eTable 6.** Longitudinal latent class model fit statistics based on 6 repeated measures

| No. Classes                                               | SSABIC                | Entropy | Smallest class (%) | LMR-LRT           |
|-----------------------------------------------------------|-----------------------|---------|--------------------|-------------------|
| <b>Complete case (n = 1,458)</b>                          |                       |         |                    |                   |
| 1                                                         | 8568.38               | n/a     | 100                | n/a               |
| 2                                                         | 7045.66               | 0.895   | 24.60              | <0.001            |
| 3                                                         | 6913.16               | 0.879   | 11.36              | 0.04              |
| 4                                                         | 6837.96               | 0.902   | 4.38               | 0.85              |
| 5                                                         | 6815.46               | 0.879   | 1.99               | 0.18              |
| 6                                                         | 6826.22 <sup>†</sup>  | 0.886   | 0.69               | 0.72 <sup>†</sup> |
| <b>Data present for 3 or more time points (n = 5,300)</b> |                       |         |                    |                   |
| 1                                                         | 26251.01              | n/a     | 100                | n/a               |
| 2                                                         | 22299.46              | 0.81    | 26.18              | <0.001            |
| 3                                                         | 21897.66              | 0.79    | 11.58              | <0.001            |
| 4                                                         | 21667.89              | 0.78    | 4.99               | 0.01              |
| 5                                                         | 21601.50              | 0.77    | 3.22               | 0.05              |
| 6                                                         | 21606.46 <sup>†</sup> | 0.77    | 1.79               | 1.00 <sup>†</sup> |

**Note:** SSABIC, sample size adjusted Bayesian Information Criterion, lower levels of SSABIC suggest a better model fit; LMR-LRT, Lo-Mendell-Rubin likelihood ratio test, LMR-LRT tests for an improvement in fit between k-1 and the k class models.<sup>8</sup>

<sup>†</sup> Note that the SSABIC and LMR-LRT provided no strong evidence that a 6-class model was an improvement on a 5-class model.

**eTable 7.** Unadjusted and adjusted associations between cigarette and/or cannabis use and psychotic experiences at age 18 years

|                                                                                                                 | All available data<br>(n = 3328, 4.27% definite PE) |        |                          |        | Limiting to individuals without<br>PE at 12 years of age<br>(n = 3179, 3.52% definite PE) |        |                          |        |
|-----------------------------------------------------------------------------------------------------------------|-----------------------------------------------------|--------|--------------------------|--------|-------------------------------------------------------------------------------------------|--------|--------------------------|--------|
|                                                                                                                 | Unadjusted                                          |        | Adjusted <sup>†</sup>    |        | Unadjusted                                                                                |        | Adjusted <sup>†</sup>    |        |
| Exposure <sup>a</sup>                                                                                           | OR<br>(95%<br>CI)                                   | P      | OR<br>(95%<br>CI)        | P      | OR<br>(95%<br>CI)                                                                         | P      | OR<br>(95%<br>CI)        | P      |
| Early cigarette-<br>only users                                                                                  | 3.03<br>(1.13,<br>8.14)                             | <0.001 | 1.78<br>(0.54,<br>5.88)  | <0.001 | 3.36<br>(1.18,<br>9.61)                                                                   | <0.001 | 2.11<br>(0.63,<br>7.05)  | <0.001 |
| Early cannabis<br>with/without<br>cigarette users                                                               | 3.79<br>(1.73,<br>8.31)                             |        | 3.70<br>(1.66,<br>8.25)  |        | 3.48<br>(1.35,<br>8.98)                                                                   |        | 3.39<br>(1.31,<br>8.79)  |        |
| Late cigarette-<br>only users                                                                                   | 0.84<br>(0.31,<br>2.31)                             |        | 0.73<br>(0.27,<br>1.98)  |        | 0.95<br>(0.30,<br>2.99)                                                                   |        | 0.84<br>(0.27,<br>2.60)  |        |
| Late cannabis<br>with/without<br>cigarette users                                                                | 3.05<br>(1.69,<br>5.53)                             |        | 2.97<br>(1.63,<br>5.40)  |        | 3.91<br>(2.11,<br>7.25)                                                                   |        | 3.73<br>(2.00,<br>6.94)  |        |
| Early cigarette-<br>only users<br>versus<br>Early cannabis<br>with/without<br>cigarette users                   | 0.80<br>(0.22,<br>2.94)                             |        | 0.48<br>(0.11,<br>2.16)  |        | 0.96<br>(0.23,<br>4.13)                                                                   |        | 0.62<br>(0.13,<br>3.07)  |        |
| Late cigarette-<br>only users<br>versus<br>Early cannabis<br>with/without<br>cigarette users                    | 0.22<br>(0.07,<br>0.70)                             |        | 0.20<br>(0.06,<br>0.63)  |        | 0.27<br>(0.07,<br>1.04)                                                                   |        | 0.25<br>(0.06,<br>0.94)  |        |
| Late cannabis<br>with/without<br>cigarette users<br>versus<br>Early cannabis<br>with/without<br>cigarette users | 0.81<br>(0.30,<br>2.15)                             |        | 0.80<br>(0.29,<br>2.18)  |        | 1.12<br>(0.37,<br>3.43)                                                                   |        | 1.10<br>(0.36,<br>3.37)  |        |
| Late cannabis<br>with/without<br>cigarette users<br>versus<br>Late cigarette-                                   | 3.63<br>(1.12,<br>11.76)                            |        | 4.06<br>(1.25,<br>13.16) |        | 4.12<br>(1.13,<br>14.96)                                                                  |        | 4.45<br>(1.24,<br>15.99) |        |

|            |  |  |  |  |  |  |  |  |
|------------|--|--|--|--|--|--|--|--|
| only users |  |  |  |  |  |  |  |  |
|------------|--|--|--|--|--|--|--|--|

**Note:** PE, psychotic experiences; OR, odds ratio; 95% CI, 95% confidence interval; UCI, upper 95% confidence interval; *P*, omnibus *P* value for association between cigarette/cannabis use classes and psychotic experiences at age 18 years.

<sup>a</sup> Compared to non-use class unless otherwise stated.

<sup>†</sup> Adjusted for sex, maternal education, emotional/behavioural problems (Strengths and Difficulties Questionnaire (SDQ) score age 9 years) and maternal cigarette smoking during pregnancy.

**eTable 8.** Associations between cigarette and/or cannabis use and psychotic experiences not experienced within 2 hours of drug or alcohol use at age 18 years

|                                                                                               | <b>All available data<br/>(n = 3819, 4.01% definite PE)</b> |          | <b>Limiting to individuals<br/>without PE at 12 years of<br/>age<br/>(n = 3646, 3.32% definite<br/>PE)</b> |          |
|-----------------------------------------------------------------------------------------------|-------------------------------------------------------------|----------|------------------------------------------------------------------------------------------------------------|----------|
| <b>Exposure<sup>a</sup></b>                                                                   | <b>OR (95% CI)</b>                                          | <b>P</b> | <b>OR (95% CI)</b>                                                                                         | <b>P</b> |
| Early cigarette-only users                                                                    | 2.97<br>(1.24, 7.11)                                        | <0.001   | 3.24<br>(1.29, 8.12)                                                                                       | 0.001    |
| Early cannabis with/without cigarette users                                                   | 1.97<br>(0.69, 5.65)                                        |          | 1.59<br>(0.40, 6.32)                                                                                       |          |
| Late cigarette-only users                                                                     | 0.94<br>(0.39, 2.27)                                        |          | 0.79<br>(0.25, 2.56)                                                                                       |          |
| Late cannabis with/without cigarette users                                                    | 2.62<br>(1.46, 4.72)                                        |          | 3.43<br>(1.89, 6.22)                                                                                       |          |
| Early cigarette-only users versus Early cannabis with/without cigarette users                 | 1.51<br>(0.36, 6.29)                                        |          | 2.03<br>(0.36, 11.47)                                                                                      |          |
| Late cigarette-only users versus Early cannabis with/without cigarette users                  | 0.48<br>(0.13, 1.69)                                        |          | 0.50<br>(0.09, 2.69)                                                                                       |          |
| Late cannabis with/without cigarette users versus Early cannabis with/without cigarette users | 1.33<br>(0.39, 4.5)                                         |          | 2.15<br>(0.48, 9.71)                                                                                       |          |
| Late cannabis with/without cigarette users versus Late cigarette-only                         | 2.80<br>(0.97, 8.07)                                        |          | 4.31<br>(1.15, 16.14)                                                                                      |          |

|       |  |  |  |  |
|-------|--|--|--|--|
| users |  |  |  |  |
|-------|--|--|--|--|

**Note:** PE, psychotic experiences; OR, odds ratio; 95% CI, 95% confidence interval; *P*, omnibus *P* value for association between cigarette/cannabis use classes and psychotic experiences not experienced within 2 hours of drug or alcohol use at age 18 years.

<sup>a</sup> Compared to non-use class unless otherwise stated.



**eTable 9.** Associations between cigarette/cannabis use and psychotic experiences versus remainder and psychotic disorder versus remainder at age 18 years

|                                                                               | All available data                                          |        |                                                      |      | Limiting to individuals without PE at 12 years of age       |         |                                                      |      |
|-------------------------------------------------------------------------------|-------------------------------------------------------------|--------|------------------------------------------------------|------|-------------------------------------------------------------|---------|------------------------------------------------------|------|
|                                                                               | Definite/suspected PE versus remainder (n = 3855, 8.53% PE) |        | Disorder versus remainder (n = 3855, 1.45% disorder) |      | Definite/suspected PE versus remainder (n = 3676, 7.43% PE) |         | Disorder versus remainder (n = 3676, 1.09% disorder) |      |
| Exposure <sup>a</sup>                                                         | OR (95% CI)                                                 | P      | OR (95% CI)                                          | P    | OR (95% CI)                                                 | P       | OR (95% CI)                                          | P    |
| Early cigarette-only users                                                    | 2.64 (1.32, 5.30)                                           | <0.001 | 3.14 (0.75, 13.22)                                   | 0.02 | 2.94 (1.45, 5.97)                                           | <0.0001 | 2.52 (0.46, 13.81)                                   | 0.31 |
| Early cannabis with/without cigarette users                                   | 3.77 (2.09, 6.79)                                           |        | 4.20 (1.26, 14.01)                                   |      | 4.01 (2.12, 7.62)                                           |         | 2.56 (0.46, 14.1)                                    |      |
| Late cigarette-only users                                                     | 1.02 (0.57, 1.84)                                           |        | 1.40 (0.40, 4.89)                                    |      | 0.96 (0.48, 1.92)                                           |         | 0.92 (0.16, 5.18)                                    |      |
| Late cannabis with/without cigarette users                                    | 2.57 (1.66, 3.96)                                           |        | 2.42 (0.87, 6.75)                                    |      | 2.96 (1.88, 4.67)                                           |         | 2.28 (0.72, 7.23)                                    |      |
| Early cigarette-only users versus Early cannabis with/without cigarette users | 0.70 (0.27, 1.81)                                           |        | 0.75 (0.11, 5.07)                                    |      | 0.73 (0.27, 1.97)                                           |         | 0.99 (0.08, 12.01)                                   |      |
| Late cigarette-only users versus Early cannabis                               | 0.27 (0.13, 0.58)                                           |        | 0.33 (0.07, 1.52)                                    |      | 0.24 (0.10, 0.56)                                           |         | 0.36 (0.04, 3.30)                                    |      |

|                                                                                               |                      |  |                      |  |                      |  |                       |
|-----------------------------------------------------------------------------------------------|----------------------|--|----------------------|--|----------------------|--|-----------------------|
| with/without cigarette users                                                                  |                      |  |                      |  |                      |  |                       |
| Late cannabis with/without cigarette users versus Early cannabis with/without cigarette users | 0.68<br>(0.33, 1.43) |  | 0.58<br>(0.12, 2.78) |  | 0.74<br>(0.33, 1.63) |  | 0.89<br>(0.11, 7.13)  |
| Late cannabis with/without cigarette users versus Late cigarette-only users                   | 2.50<br>(1.21, 5.17) |  | 1.73<br>(0.36, 8.25) |  | 3.10<br>(1.35, 7.09) |  | 2.49<br>(0.31, 20.15) |

**Note:** PE, psychotic experiences; OR, odds ratio; 95% CI, 95% confidence interval; *P*, omnibus *P* value for association between cigarette/cannabis use and psychotic experiences/disorder at age 18 years.

<sup>a</sup> Compared to non-use class unless otherwise stated.

**eTable 10.** Unadjusted and adjusted associations between psychotic experiences at age 12 years and subsequent cigarette and/or cannabis use

| Exposure                         | Early - onset cigarette        | Early-onset cannabis | Late-onset cigarette | Late-onset cannabis | Early - onset cigarette versus Early - onset cannabis | Late-onset cigarette versus Early - onset cannabis | Late-onset cannabis versus Early - onset cannabis | Late-onset cannabis versus Late-onset cigarette |                 |
|----------------------------------|--------------------------------|----------------------|----------------------|---------------------|-------------------------------------------------------|----------------------------------------------------|---------------------------------------------------|-------------------------------------------------|-----------------|
|                                  | <b>OR<sup>a</sup> (95% CI)</b> |                      |                      |                     |                                                       |                                                    |                                                   |                                                 | <b><i>P</i></b> |
| <b>Unadjusted</b>                |                                |                      |                      |                     |                                                       |                                                    |                                                   |                                                 |                 |
| Definite PE (n = 4101, 4.93% PE) | 1.17 (0.41, 3.33)              | 0.97 (0.31, 3.00)    | 1.76 (1.01, 3.10)    | 1.66 (0.94, 2.91)   | 1.21 (0.24, 6.07)                                     | 1.83 (0.55, 6.03)                                  | 1.72 (0.47, 6.29)                                 | 0.94 (0.43, 2.06)                               | 0.14            |
| <b>Adjusted<sup>†</sup></b>      |                                |                      |                      |                     |                                                       |                                                    |                                                   |                                                 |                 |
| Definite PE (n = 4101, 4.93% PE) | 0.86 (0.27, 2.81)              | 0.93 (0.28, 3.06)    | 1.60 (0.91, 2.82)    | 1.65 (0.90, 3.05)   | 0.93 (0.16, 5.55)                                     | 1.73 (0.49, 6.06)                                  | 1.78 (0.45, 6.97)                                 | 1.03 (0.45, 2.36)                               | 0.25            |

**Note:** PE, psychotic experiences; OR, odds ratio; 95% CI, 95% confidence interval; *P*, omnibus *P* value for association between psychotic experiences at age 12 years and cigarette/cannabis use classes.

<sup>a</sup> Compared to non-use class unless otherwise stated.

<sup>†</sup> Adjusted for sex, maternal education, emotional/behavioural problems (Strengths and Difficulties Questionnaire (SDQ) score age 9 years) and maternal cigarette smoking during pregnancy.

**eTable 11.** Associations between psychotic experiences at age 12 years and subsequent cigarette and/or cannabis use, limiting to non-users at age 12 years

| Exposure                                     | Early - onset cigarette        | Early-onset cannabis | Late-onset cigarette | Late-onset cannabis | Early - onset cigarette versus Early - onset cannabis | Late-onset cigarette versus Early - onset cannabis | Late-onset cannabis versus Early - onset cannabis | Late-onset cannabis versus Late-onset cigarette |          |
|----------------------------------------------|--------------------------------|----------------------|----------------------|---------------------|-------------------------------------------------------|----------------------------------------------------|---------------------------------------------------|-------------------------------------------------|----------|
|                                              | <b>OR<sup>a</sup> (95% CI)</b> |                      |                      |                     |                                                       |                                                    |                                                   |                                                 | <b>P</b> |
| <b>All available data</b>                    |                                |                      |                      |                     |                                                       |                                                    |                                                   |                                                 |          |
| Definite PE (n = 4700, 5.23% PE)             | 0.82 (0.27, 2.54)              | 1.16 (0.46, 2.93)    | 1.76 (1.05, 2.93)    | 1.69 (1.03, 2.79)   | 0.71 (0.15, 3.25)                                     | 1.51 (0.56, 4.07)                                  | 1.45 (0.50, 4.28)                                 | 0.96 (0.48, 1.94)                               | 0.07     |
| <b>Limiting to non-users at age 12 years</b> |                                |                      |                      |                     |                                                       |                                                    |                                                   |                                                 |          |
| Definite PE (n = 4160, 5.00% PE)             | 0.17 (0.00, 48.24)             | 1.12 (0.26, 4.89)    | 1.46 (0.82, 2.60)    | 1.49 (0.86, 2.57)   | 0.15 (0.00, 61.07)                                    | 1.30 (0.28, 6.00)                                  | 1.32 (0.26, 6.64)                                 | 1.02 (0.46, 2.27)                               | 0.42     |
| <b>Limiting to non-users at age 12 years</b> |                                |                      |                      |                     |                                                       |                                                    |                                                   |                                                 |          |
| <b>Unadjusted</b>                            |                                |                      |                      |                     |                                                       |                                                    |                                                   |                                                 |          |
| Definite PE (n = 3646, 4.66% PE)             | 0.40 (0.02, 10.07)             | 0.28 (0.01, 14.89)   | 1.36 (0.72, 2.60)    | 1.46 (0.80, 2.68)   | 1.45 (0.01, 332.66)                                   | 4.91 (0.09, 267.58)                                | 5.28 (0.09, 317.16)                               | 1.07 (0.44, 2.63)                               | 0.56     |
| <b>Adjusted<sup>†</sup></b>                  |                                |                      |                      |                     |                                                       |                                                    |                                                   |                                                 |          |
| Definite PE (n = 3646, 4.66% PE)             | 0.20 (0.00, 24.59)             | 0.16 (0.00, 202)     | 1.23 (0.64, 2.39)    | 1.55 (0.82, 2.95)   | 1.19 (0.00, 8920)                                     | 7.53 (0.01, 8980)                                  | 9.48 (0.01, 13600)                                | 1.26 (0.49, 3.23)                               | 0.63     |

**Note:** PE, psychotic experiences; OR, odds ratio; 95% CI, 95% confidence interval; P, omnibus P value for association between psychotic experiences at age 12 years and cigarette/cannabis use classes.

<sup>a</sup> Compared to non-use class unless otherwise stated.

† Adjusted for sex, maternal education, emotional/behavioural problems (Strengths and Difficulties Questionnaire (SDQ) score age 9 years) and maternal cigarette smoking during pregnancy.

**eFigure.** Comparisons between 5-class models of cigarette/cannabis use patterns created using six and four time points



**Note:** The probability axis represents the probability of a class member being a non-user, a cigarette-only user or a cannabis with/without cigarette user at each time point.



## eReferences

1. Horwood J, Salvi G, Thomas K, et al. IQ and non-clinical psychotic symptoms in 12-year-olds: results from the ALSPAC birth cohort. *British Journal of Psychiatry*. 2008;193:185-191.
2. Zammit S, Kounali D, Cannon M, et al. Psychotic experiences and psychotic disorders at age 18 in relation to psychotic experiences at age 12 in a longitudinal population-based cohort study. *Am J Psychiatry*. 2013;170:742-750.
3. Zammit S, Hamshere M, Dwyer S, et al. A population-based study of genetic variation and psychotic experiences in adolescents. *Schizophrenia Bull*. 2014;40(6):1254-1262.
4. Wechsler D, Golombok S, Rust J. *Wechsler Intelligence Scale for Children – Third Edition UK Manual*. Sidcup, UK: The Psychological Corporation; 1992.
5. Goodman R. The extended version of the strengths and difficulties questionnaire as a guide to child psychiatric caseness and consequent burden. *J Child Psychol Psych*. 1999;40(5):791-799.
6. Crane C, Heron J, Gunnell D, Lewis G, Evans J, Williams JMG. Childhood traumatic events and adolescent overgeneral autobiographical memory: findings in a UK cohort. *J Behav Ther Exp Psy*. 2014;45(3):330-338.
7. Heron JE, Croudace TJ, Barker ED, Tilling K. A comparison of approaches for assessing covariate effects in latent class analysis. *Longitudinal and Life Course Studies*. 2015;6(4):15.
8. Lo Y, Mendell NR, Rubin DB. Testing the number of components in a normal mixture. *Biometrika*. 2001;88(3):767-778.
